# Supplementary material
Source: PubMed Central journal article supplement (PMC3074572)

SUPPLEMENTAL INFORMATION.

S01. MALDI-TOF for affinity peptides

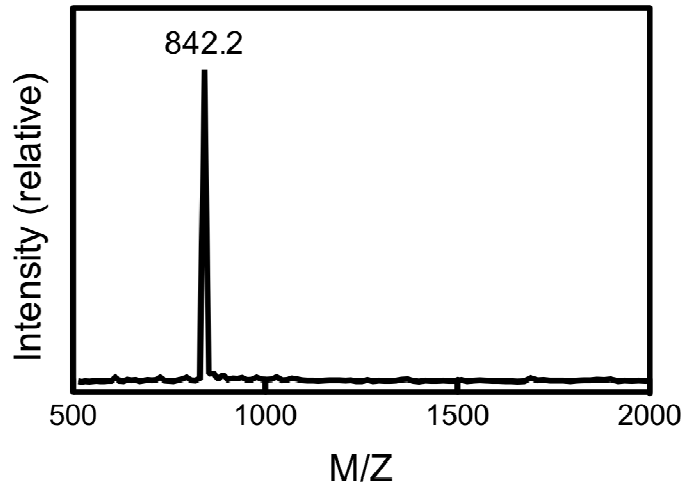

A. MALDI-TOF spectra for GGGGWSHW peptide. Theoretical molecular weight = 842.8

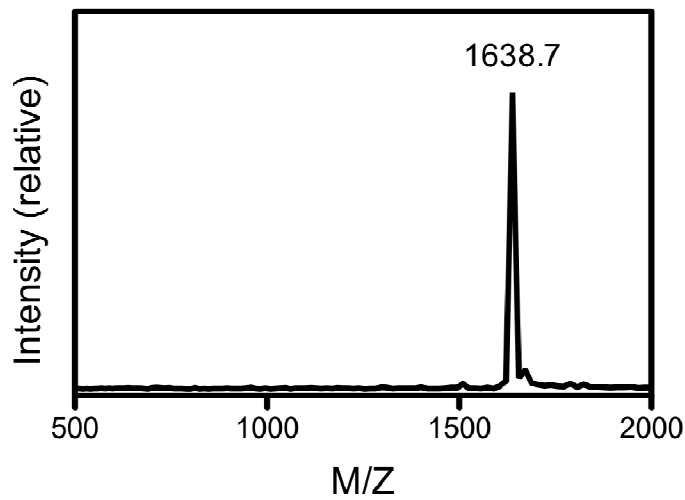

B. MALDI-TOF spectra for KRIWFIPRSSWY peptide. Theoretical molecular weight = 1638.9

## SUPPLEMENTAL INFORMATION.

### S02. Hydrodynamic radius estimates from Stokes-Einstein, in water at 20°C.

The Stokes-Einstein diffusivity relationship can be used to calculate the effective hydrodynamic radius from protein diffusivity. Diffusivities on the order of  $10^{-6}$  to  $10^{-7}$   $\text{cm}^2/\text{s}$  are typically reported for proteins in aqueous solutions. For a diffusivity greater than  $3.0 \times 10^{-7}$   $\text{cm}^2/\text{s}$ , the estimated hydrodynamic diameter for TGF $\beta_1$  calculated from Stokes-Einstein is 160 Å similar in size or smaller than the estimated mesh size for all three PEG gels.

| Diffusivity<br>( $\text{cm}^2/\text{s}$ ) | Hydrodynamic Radius<br>(Å) |
|-------------------------------------------|----------------------------|
| $1.00 \times 10^{-7}$                     | 237                        |
| $1.25 \times 10^{-7}$                     | 190                        |
| $1.50 \times 10^{-7}$                     | 158                        |
| $2.00 \times 10^{-7}$                     | 119                        |
| $2.25 \times 10^{-7}$                     | 105                        |
| $2.50 \times 10^{-7}$                     | 95                         |
| $3.00 \times 10^{-7}$                     | 79                         |
| $4.00 \times 10^{-7}$                     | 59                         |
| $5.00 \times 10^{-7}$                     | 47                         |
| $1.00 \times 10^{-6}$                     | 24                         |

SUPPLEMENTAL INFORMATION.

S03. Selected protein molecular weights and hydrodynamic radii\*

| Protein                             | Molecular Weight (Da) | Reported $r_H$ (Å) |
|-------------------------------------|-----------------------|--------------------|
| Bovine pancreatic trypsin inhibitor | 6,500                 | 15.8               |
| Cytochrome C                        | 12,000                | 17.8               |
| Lysozyme                            | 14,700                | 20.5               |
| Streptokinase                       | 47,000                | 30.6               |
| Triosephosphate isomerase (dimer)   | 54,000                | 29.7               |

\* data taken from Wilkins, D. K.; Grimshaw, S. B.; Receveur, V.; Dobson, C. M.; Jones, J. A.; Smith, L. J. *Biochemistry* 1999, 38, 16424-16431.

SUPPLEMENTAL INFORMATION.

S04. Swollen shear modulus for control and peptide gels. T-test showed no significant difference between moduli for control gels and gels made with either WSHW (R=10,000) or KRIWFIPRSSWY (R=10,000). Measurements made at 5 rad/s using dynamic strain sweep from 1% to 100% strain at 25°C.

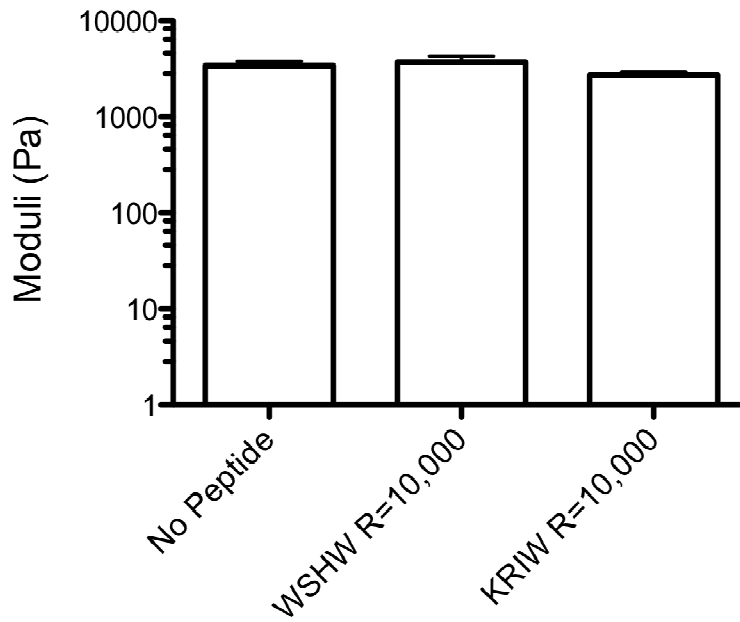

Supplement: bm101379v_si_001.pdf [file bm101379v_si_001.pdf]
